1     **Characterization of maternal mortality and severe maternal morbidity before and**  
2                     **during covid-19: an analysis for the Dominican Republic**

3  
4     Kary Desiree Santos-Mercedes<sup>1\*</sup>, Raquel Zanatta Coutinho<sup>1</sup>

5  
6     1 Department of Demography, Center for Regional Development and Planning of the  
7     Faculty of Economic Sciences (CEDEPLAR), Federal University of Minas Gerais, Belo  
8     Horizonte, MG, Brazil.

9  
10    \* Corresponding author: [karysantos017@gmail.com](mailto:karysantos017@gmail.com)

11  
12    #<sup>a</sup>Pres. Antônio Carlos Avenue, 6627 - Pampulha, Belo Horizonte - MG, 31270-901, Brazil.

13

14

**ABSTRACT**

15    The Covid-19 pandemic disturbed the delivery of health services, which included obstetric  
16    care, in many parts of the world. In countries where maternal mortality was already  
17    elevated before the pandemic, this disruption brought about catastrophic events. Using  
18    data from the Sistema Nacional de Vigilancia Epidemiológica (SINAVE) of the maternal  
19    morbidity and mortality of the Dominican Republic, this paper estimated the severe  
20    maternal morbidity rate and the maternal mortality rate by causes of death (direct,  
21    indirect, and specific causes). Mixed effects models were used to identify individual and

**NOTE: This preprint reports new research that has not been certified by peer review and should not be used to guide clinical practice.**

22 contextual factors that contribute to a higher risk of dying. Results indicate that the  
23 severe maternal morbidity rate decrease from 12.1 to 10.4 per 1,000 live births in 2020  
24 compared to 2019; however, the maternal mortality rate went from 91.4 to 124.2 per  
25 100,000 live births in the same period. In 2021, a significant increase in morbidity and  
26 mortality was observed, registering a rate of 16.5 cases of severe maternal morbidity per  
27 1,000 live births and a rate of 153.7 maternal deaths per 100,000 live births. Additionally,  
28 maternal mortality in the Dominican Republic is associated with the sociodemographic  
29 and economic conditions of women, revealing inequalities related to national origin, area  
30 of residence and access to health services which were worsening during the pandemic.

31

32 **Keywords:** Severe Maternal Morbidity Ratio; Maternal Mortality Ratio; Covid-19;

33 Dominican Republic; Social Determinants of Health

34

35

36

## 37 INTRODUCTION

38 Maternal mortality is an indicator closely related to the economic and social development  
39 of countries, revealing inequalities in women's living conditions. In developing countries,  
40 the risk of maternal death over a woman's lifetime is nearly 40 times higher than in  
41 developed countries. Approximately 830 women worldwide die each day from  
42 pregnancy- or childbirth-related complications (1). Almost all of these deaths occur in  
43 low-income countries (1,2). In Latin America and the Caribbean, approximately 15,000  
44 women die each year from pregnancy-related causes (3,4). Research shows that two-  
45 thirds of maternal deaths are preventable with timely medical care and ideal conditions  
46 (5).

47 Maternal death is defined as the death of a woman during pregnancy or within 42 days  
48 after childbirth or termination of pregnancy, regardless of the duration or location, due to  
49 any pregnancy-related cause aggravated by pregnancy or its management, but not by  
50 accidental or incidental causes (6). WHO uses the term Severe Maternal Morbidity (SMM)  
51 to describe obstetric events occurring during pregnancy, childbirth, or the 42 days  
52 postpartum, whether acute, chronic, or both, in which the mother survived but was at risk  
53 of dying (1). It is estimated that these women share the same pathological and  
54 circumstantial conditions as those who actually died from the same complication,  
55 providing better information about the entire process(4).

56 Despite the high number, maternal survival has significantly improved since the adoption  
57 of the Sustainable Development Goals. Between 1990 and 2013, global maternal  
58 mortality decreased by 45%. And more than 71% of births worldwide were attended by  
59 skilled health personnel in 2014, compared to around 59% in 1990. However, maternal

60 mortality remains high in some parts of the world, reflecting inequalities in access to  
61 health care services and highlighting the gaps between rich and poor, reflecting social  
62 inequalities, low coverage, and poor quality of health services (7).

63 The maternal mortality ratio in developing countries in 2015 was 239 maternal deaths  
64 per 100,000 live births, compared to developed countries which had only 12 maternal  
65 deaths per 100,000 live births. There are significant disparities between countries, but  
66 there are also disparities within countries, among women with high and low incomes, by  
67 educational level, and by location, whether urban or rural (1,4).

68 In 2013, the Dominican Republic showed a maternal mortality ratio of approximately 102  
69 deaths per 100,000 live births, and by the year 2016, it had decreased to a ratio of 92.1  
70 deaths per 100,000 live births. This indicator hides the heterogeneity of the country's  
71 health situation, as there are health regions that had a higher maternal mortality ratio  
72 than the national average and others below it, such as the case of the Northwest Cibao  
73 Region (Indicator well above the average) and the Central Cibao Region (Indicator below  
74 the average) (8,9). These data exceed the average for the Latin American and Caribbean  
75 region (9). Despite governmental efforts in the matter, the Dominican Republic has not  
76 been able to experience a significant reduction in maternal mortality, which distances the  
77 country from achieving the 2030 Agenda and the Sustainable Development Goals  
78 (10,11). It is imperative to highlight that the Dominican Republic, being a country with a  
79 high middle income (8,476.75 USD per capita (12,13) that has a high coverage of prenatal  
80 care (98.9%) and institutional delivery (97.5%).

81 The COVID-19 pandemic caused an increase in maternal mortality in the Dominican  
82 Republic (13). Data shows that in 2020, a rate of 127 per 100,000 live births was recorded,

83 well above the average for Latin America, which was 67 per 100,000 live births. Studies  
84 conducted during the first year of the COVID-19 pandemic show that pregnancy and the  
85 postpartum period could indeed pose additional risks for both women and babies (14).  
86 Still, high-income countries have not observed an increase in pregnancy-related mortality,  
87 leading to the belief that the increase in maternal mortality ratio due to COVID-19 could  
88 be explained by some situations related to the more vulnerable context and obstetric care  
89 directly affecting women and babies. According to (15), poor quality prenatal care,  
90 insufficient resources to manage emergency and critical care, racial disparities in access  
91 to maternity services, obstetric violence, and the pandemic pose additional barriers to  
92 accessing health care.

93 With the aim of understanding the situation of severe maternal morbidity and maternal  
94 mortality in the national context, characterizing maternal mortality due to Covid-19 in the  
95 Dominican Republic in individual, contextual, and healthcare system aspects, this work  
96 utilizes data from the National Epidemiological Surveillance System (SINAVE) and the  
97 online live births database for the period 2015-2021. First, severe maternal morbidity  
98 ratios (SMMR) were estimated for the period 2015-2021. Then, maternal mortality ratios  
99 (MMR) were estimated for the period 2015-2021 by cause of death (direct, indirect, and  
100 specific ICD causes), verifying if, from 2020 onwards, there was a change in the observed  
101 behavior for the period. Finally, sociodemographic inequalities to which pregnant women  
102 were exposed before and during the Covid-19 pandemic are examined from the  
103 perspective of social determinants of health, identifying individual and contextual factors  
104 that would contribute to a higher risk of dying from COVID-19.

## 105 **Literature review**

106 The estimated fertility rate for the Dominican Republic was 2.2 (16). With a life  
107 expectancy at birth for 2021 of 74.02 years and infant mortality of 20.2 per 1,000 live  
108 births (17). The country had 21% of the population below the poverty line in 2019 (16,18).  
109 Between 2002 and 2014, there was a decrease in the percentage of pregnant individuals  
110 who attended four or more prenatal care visits during pregnancy, as it decreased from  
111 93.5% to 92.9%. On the other hand, 99.7% of births were attended by skilled personnel in  
112 2018 (19,20). Regarding COVID-19 in 2020, the Dominican Republic ranked 26th within  
113 the Americas Region in terms of the number of deaths from COVID-19 (16,18).

114 The Dominican state has undertaken various interventions in maternal and child health  
115 over the past decades with objectives focused on strengthening programmatic networks  
116 and collective health actions as established in international conferences of which the  
117 country was a signatory (1,21). Although the interventions have contributed to sustained  
118 reductions in maternal and child mortality, the program goals have not yet been achieved  
119 (2,10,22), such as the goal set in the MDG 5 to reduce by 75% the maternal mortality rate  
120 that existed in the early 1990s.

121 Santos and Patricio (8) argue that the national average tends to conceal the  
122 heterogeneity of the health situation within the country, as mortality assumes a  
123 differential behavior according to the geographical regions of each country. At the  
124 provincial level, the areas with the highest maternal mortality ratio for 2016 correspond,  
125 to a greater extent, to small provinces in terms of population, such as Independencia,  
126 Santiago Rodríguez, Bahoruco, Pedernales, and Elías Piña. Some of these provinces are  
127 located in the border area with Haiti, with high levels of poverty and limited coverage of

128 some basic services. The results also show that the provinces of María Trinidad Sánchez  
129 and San Pedro de Macorís are in the group with the highest mortality ratio (8).

### 130 **Causes of maternal mortality**

131 The International Statistical Classification of Diseases (ICD) typifies and defines deaths  
132 during pregnancy, childbirth, and the puerperium as direct or indirect maternal deaths  
133 (23). Direct maternal death is the consequence of complications due to pregnancy,  
134 childbirth, and the puerperium or their management. In 2016, in the Dominican Republic,  
135 they represented 74% of maternal deaths, with hypertensive disorders standing out as  
136 the leading cause of maternal death within this group (32%), followed by hemorrhages  
137 (11%), sepsis (10%), pregnancy terminated by abortion (8%), and complications of the  
138 puerperium (7%). Conversely, indirect maternal death is one generated as a consequence  
139 of pre-existing diseases or other associated conditions that appear during pregnancy  
140 and, although not related to it, lead to death because they are aggravated by the  
141 physiological effect of pregnancy. In 2016, they represented 26% of deaths. Examples of  
142 indirect deaths include malaria, hepatitis, or HIV infection (24). Additionally, late maternal  
143 death is classified as those occurring after 40 days of the puerperium but before one year  
144 after childbirth.

145 Regarding severe maternal morbidity, rates range from 3.8 to 12 per 1,000 births in  
146 developed countries. There have been few reports in Latin America, so the true extent of  
147 the problem is unknown, and studies have only been conducted in Brazil and Cuba (4,25–  
148 27). In Brazil, for example, they estimated that severe maternal morbidity is close to 21.13  
149 cases per 1,000 admissions for the period 2010-2019 at the national level.

150 Various national and international studies indicate that most complications that arise  
151 during pregnancy, childbirth, or the puerperium occur during gestation, with higher rates  
152 among women aged 40 and over, preceded by the age group of 14 to 19 years, and these  
153 are highly preventable or treatable. Others may be present before pregnancy but worsen  
154 during pregnancy, especially if not treated as part of women's health care or maternal  
155 health care (1,9,28,29).

156 Most of them are foreseeable, undoubtedly linked to insufficient education and cultural  
157 barriers of the population to the use of medical services, aggravated by inaccessibility to  
158 obstetric care and the limited quality of such care, in addition to the lack of knowledge  
159 and understanding of the problems that occur during pregnancy(30,31). The Latin  
160 America and the Caribbean region have health systems with limited capacity, with lower  
161 health financing, fewer hospital beds, lower satisfaction levels, and a lower doctor/patient  
162 ratio (32).



## 163 **Maternal Mortality and Covid-19**

164 During the pandemic, the World Health Organization warned that pregnant women were  
165 at greater risk of developing more aggressive forms of COVID-19 and, in some cases,  
166 could progress to death (18). Physiological and immunological changes during  
167 pregnancy can lead to more complicated clinical events, causing fetal distress,  
168 premature rupture of membranes, premature births, and stillbirths (33). Takemoto  
169 comment that, for developing countries, high birth rates and limited health resources  
170 would result in an increase in maternal deaths (15).

171 Regarding care, there is suspicion of a higher risk of postoperative morbidity and  
172 mortality for women with COVID-19 undergoing cesarean section surgery (1,32,34).  
173 Regarding the cesarean section rate in the Dominican Republic, even without COVID-19,  
174 it is close to 58%, which is among the highest in the world, far from the 15% accepted by  
175 the WHO (35).

176 Unplanned pregnancies, deficiencies in prenatal care, the concentration of resources to  
177 address the coronavirus, and the large number of cesarean births are situations that  
178 affect the Dominican Republic and, along with other reasons, could worsen the  
179 Dominican reality regarding maternal mortality during the coronavirus pandemic(36).  
180 This leads to a hypothesis that COVID-19 intensifies the inequalities associated with  
181 maternal mortality.

## 182 **Social Determinants of Health and Covid-19**

183 Health inequality are not limited to access to medical services or certain types of care.  
184 The social determinants model illustrates how social dynamics interplay to create social

185 gradients in health (37). Housing, education, employment, geography, environment, and  
186 economic conditions directly or indirectly affect their well-being and health (18,37,38).

187 Contextual factors that create social hierarchies or stratifications in societies produce  
188 inequalities in maternal health (39–41). There is evidence that in the Dominican Republic,  
189 maternal mortality is higher in territories with higher levels of multidimensional poverty  
190 or in localities with lower levels of human development. Furthermore, the probability of a  
191 woman dying from causes related to pregnancy, childbirth, or the postpartum period in  
192 the most socially disadvantaged territories was about twice as high compared to the  
193 most socially advantaged territories (8).

194 Within the structural determinants, factors such as economic level, race and ethnicity,  
195 religion, gender, education, and occupation are also important (41–43). Regarding  
196 intermediate health determinants, Hamal (41) point to factors in the community context  
197 that include: area of residence, family context (family structure, decision-making power,  
198 access to resources, marital communication), peer cohesion (support networks), factors  
199 of the individual context (biological, such as age, parity, weight, height, health status  
200 (infections and parasitic diseases), behavior (family planning, pre-/intra-/postnatal care,  
201 emergency obstetric care, harmful traditional practices), and psychosocial factors.

202 Also, the part corresponding to the health system encompasses factors such as:  
203 availability of health systems (family planning, pre-/intra-/postnatal care, emergency  
204 obstetric care, referral, blood), accessibility (distance, time, transportation, transportation  
205 cost, formal and informal payments for health services, medicines and supplements,  
206 opportunity costs, companions, bribes, distribution and location of health facilities),  
207 quality of care (previous experience, satisfaction with services and costs, quantity of

208 personnel/competence, diagnosis and action management), and lastly other unknown  
209 or unpredicted factors (41,42).

210

211 In the pandemic crisis, the worsening of inequalities is largely due to containment policies  
212 used to overcome the crisis (44,45). Using the words of Giannopoulou and Tsobanoglou  
213 (46), limiting access to healthcare for a significant portion of the population, closing  
214 medical centers for in-person visits, postponing appointments, and providing medical  
215 and diagnostic assistance to non-priority individuals due to justified fear of infection in  
216 hospitals translates into a significant impact on some pathologies.

217 In the case of COVID-19, they indicate that social status largely determines the risk of the  
218 virus, accessibility to healthcare, and the effectiveness of confinement measures (47).

219 Conversely, the virus tends to increase inequality by reducing the incomes or work  
220 capacity of those infected or those who have stopped working due to restrictions (48).

221 The aforementioned corroborates that the situation has affected population groups at  
222 greater risk who face challenges in accessing healthcare services (49). In this particular  
223 case, women may be disproportionately affected by the crisis: their income levels are, on  
224 average, lower than those of men, their poverty levels are higher, and they are more likely  
225 to be exposed to domestic violence (32).

226 From a theoretical perspective, various proposals have been developed for the  
227 elaboration of conceptual models for studying the determinants of maternal mortality  
228 and severe maternal mortality and morbidity (5,38,50–52), including the use of SINAVE  
229 (53). The models address the problems by integrating potentially fatal complications  
230 associated with the reproductive process and its surveillance with variables representing

231 socioeconomic contextual conditions at the municipal and departmental levels. The  
232 variety of data structures used in epidemiological studies and the availability of statistical  
233 procedures have increased the use of multilevel models. Some researchers like Maia (54)  
234 argue that multilevel models emerge as an alternative to traditional multivariate models  
235 by considering the intrinsic hierarchical nature of the data and analyzing the  
236 autocorrelation between risk factors at aggregation levels.

## 237 **MATERIALS AND METHODS**

### 238 **Data**

#### 239 **Sistema Nacional de Vigilancia Epidemiológico (SINAVE)**

240 We use data from the National Epidemiological Surveillance System (SINAVE), captured  
241 by the Dirección General de Epidemiología and coordinated by the Ministry of Public  
242 Health and Social Assistance (MSP). The population under surveillance in this database  
243 of severe maternal morbidity and maternal death (including late ones) consists of  
244 pregnant or postpartum women aged 10 to 49 years. In addition, for the notification of  
245 severe maternal morbidity, the following criteria are established: 1) diagnosis of  
246 eclampsia, hypovolemic shock, and septic shock. 2) need for transfusion (of 3 or more  
247 units of any blood product), ICU admission, and/or emergency surgical procedure. 3)  
248 organ dysfunction or failure: cardiac, vascular, renal, hepatic, metabolic, cerebral,  
249 respiratory, and/or coagulation (55). The database contains 80 variables related to the  
250 woman, childbirth, and healthcare institution. For specifications on the database, see  
251 (29).

252 According to ECLAC (56), since the implementation of SINAVE, there has been a  
253 significant improvement in coverage of maternal deaths. Over the years, maternal

254 mortality has been limited by problems of underreporting, either due to omission, errors  
255 in recording causes of death (56), or differences in province-to-province coverage (57).

256 We conducted an analysis of data completeness and validation. Additionally, we  
257 corrected the SINAVE database based on the REDENAF coverage. Between the years  
258 2015 and 2021, a total of 14,655 cases of severe maternal morbidity and maternal  
259 mortality were reported.

## 260 **Maternal Death Classification and COVID-19 Infection Classification**

261 The causes of death during pregnancy, childbirth, and the postpartum period, or late  
262 maternal deaths, according to ICD-10, are listed in Table 1 (4,23). These are subdivided  
263 into three categories: direct obstetric deaths, indirect obstetric deaths, and late obstetric  
264 deaths.

265

266 **Table 1. Groups of basic causes of death during pregnancy, childbirth, and**  
267 **the puerperium by ICD-10 codes**

| <b>DIRECT CAUSES</b>                                                                      | <b>Code ICD-10</b>  |
|-------------------------------------------------------------------------------------------|---------------------|
| Edema, proteinuria and hypertensive disorders in pregnancy, childbirth and the puerperium | (O10-O16)           |
| Hemorrhage in early pregnancy, antepartum and postpartum                                  | (O20, O44-O46, O72) |
| Pregnancy with abortive outcome                                                           | (O00-O08)           |
| Complications predominantly related to the puerperium                                     | (O87-O92)           |
| Sepsis and other puerperal infections                                                     | (O85-O86)           |

|                                                 |                             |
|-------------------------------------------------|-----------------------------|
| Other complications of pregnancy and childbirth | (021-043, 060-071, 073-075) |
| Obstetric death of unspecified cause            | (095)                       |

---

**INDIRECT CAUSES**

---

|                                                                            |           |
|----------------------------------------------------------------------------|-----------|
| Human immunodeficiency virus [HIV] disease                                 | (B20-B24) |
| Other viral diseases complicating pregnancy, childbirth and the puerperium | (0985)    |
| Death from any obstetric cause                                             | (098-099) |

---

**Late death**

---

- 268 Source: WHO Guide for the Application of ICD-10 to Deaths Occurring During Pregnancy, Childbirth, and the Puerperium: CIEMM,  
269 2012 & Maternal Mortality Situation in the Dominican Republic, MSP, 2016

270 In the Dominican Republic, there have been more than 659,761 cases of morbidity and  
271 over 4,384 deaths from COVID-19 infectious respiratory disease as of January 21, 2023  
272 (Johns Hopkins Coronavirus Resource Center, 2023), with a mortality rate close to 39.7  
273 per 100,000 inhabitants (58). The initial declaration of a health emergency by the WHO  
274 and the subsequent review of the pandemic required the creation of a new specific code  
275 for Covid-19, U07.1 (59). If during pregnancy, childbirth, or the puerperium, a woman is  
276 admitted (or has a medical care episode) for a condition due to COVID-19, it should be  
277 registered as the main diagnosis, with a code from the subcategory O98.5 "Other viral  
278 diseases complicating pregnancy, childbirth, and the puerperium", followed by the code  
279 U07.1. Codes related to COVID-19 always take priority in sequence (59).

## 280 **Live Births**

281 Information regarding live births is available on the website of the Ministry of Public  
282 Health and Social Assistance of the Dominican Republic. These data comprise an annual  
283 consolidated report from three registration sources: the Weekly Report of Syndromes,  
284 Diseases, and Events of Mandatory Notification (EPI-1), the specialized services  
285 production form (67th), and the online birth registry database, resulting in a single  
286 consolidation for each establishment depending on the completeness of each source  
287 (55).

## 288 **METHODS**

289 In order to estimate the Severe Maternal Morbidity Ratios (SMMR) and the Maternal  
290 Mortality Ratios (MMR) for the period 2015-2021 by cause of death (direct, indirect, and  
291 specific causes of the ICD), descriptive analyses were performed. Cases of Severe

292 Maternal Morbidity (SMM) are identified as women who entered the surveillance system  
293 during pregnancy, childbirth, or the puerperium and left the system under the condition  
294 of "alive"; for Maternal Mortality (MM) cases, women in the "deceased" condition are  
295 considered. The main objective was to verify if there was a change in the observed  
296 behavior starting from 2020.

### 297 **Maternal Mortality Ratio**

298 The Maternal Mortality Ratio (MMR) is the most commonly used measure of maternal  
299 mortality and is described as the relationship between the number of deaths due to  
300 maternal causes and the number of live births in the same period of time. To calculate it,  
301 late maternal deaths are excluded from the numerator. For the estimation of the MMR,  
302 maternal deaths of women aged 10 to 49 years were used for each year from 2015 to  
303 2021 as the numerator, and live births from the same period were used as the  
304 denominator. Expressed per 100,000 live births, it measures the risk of death due to  
305 obstetric reasons once a woman becomes pregnant.

306 It is worth noting that for the calculation of this indicator, maternal deaths captured by  
307 SINAVE were used without correction, due to the good coverage and quality of SINAVE  
308 information. Literature indicates that there is no need to use a correction factor in  
309 provinces where the death is well investigated, such as in Belo Horizonte, for example  
310 (60). We also calculated the adjusted MMR ( $MMR_{adj}$ ) using a correction factor of 2.46%  
311 for maternal deaths in the numerator (representing the average percentage of non-  
312 coverage of SINAVE relative to RENADEF). The last is considered a more conservative  
313 ratio.

### 314 **Severe Maternal Morbidity Ratio**



315 To estimate Severe Maternal Morbidity (SMM) in the Dominican Republic between 2015  
316 and 2021, the SMM cases in women aged 10 to 49 years for each year observed in the  
317 period was divided by the number of live births in the period, according to the WHO  
318 guidelines (61). For this indicator, similar to the Maternal Mortality Ratio (MMR) indicator,  
319 no adjustment was made to exclude births of women older than 49 years from the  
320 denominator due to their low proportion.

### 321 **Proportion of maternal deaths due to a specific cause**

322 The proportion of deaths due to a specific cause refers to the incidence of a death due to  
323 a specific cause as percentage of all maternal deaths. For the calculation of the  
324 proportion of deaths due to a cause, the number of direct and indirect obstetric deaths  
325 were used as the numerator, divided by the total number of maternal deaths (62).

### 326 **Maternal Mortality Ratio by specific cause**

327 The Maternal Mortality Ratio by specific cause corresponds to the number of maternal  
328 deaths due to a specific cause per 100,000 live births.

### 329 **Mixed effect models**

330 To examine the sociodemographic inequalities to which women in pregnancy, childbirth,  
331 or the postpartum period were exposed before and during the Covid-19 pandemic, we  
332 used individual level data from SINAVE, which contains cases of extreme maternal  
333 morbidity and maternal mortality. Of the total of 14,655 complete case records, 1,431  
334 (9.8%) presented the condition of interest (death), considered as the dependent variable.  
335 Women's characteristics were used as explanatory variables while contextual variables

336 were aggregated at the level of each of the provinces of residence of women, constructed  
337 using the databases of the National Multiple-Purpose Household Surveys (63) conducted  
338 by the National Statistics Office of the Dominican Republic. Contextual variables are  
339 proportions calculated with women aged 10 to 49 years as the denominator in each  
340 province. A summary can be seen in Table 1.

341 Multilevel models were adjusted with the purpose of controlling the effect of observations  
342 in each of the 32 provinces (intracluster correlation). For this, mixed effects models with  
343 a logit link function (due to the dichotomous nature of the dependent variable) were  
344 performed, placing contextual variables and the year receiving health care as random  
345 effects, while individual-level variables were placed as fixed effects in the model.  
346 Additionally, interactions between the year of receiving care and residence in a border  
347 province were conducted under a multiplicative effect interaction. To obtain risk  
348 estimates (OR), the estimated coefficients from the model were exponentiated, and a  
349 level of statistical significance of 0.05 was assumed. R Studio software version 4.2.1 was  
350 used to carry out the analyses described.

351 **RESULTS**

352 Severe Maternal Morbidity Ratio (SMMR)

353 In the period between 2015 to 2021, 13,224 cases of extreme maternal morbidity were  
354 registered in the National Epidemiological Surveillance System (SINAVE), involving  
355 women aged 10 to 49 years residing in the Dominican Republic.

356 Figure 1 shows the numbers of SMM cases and the SMMR by year. It can be observed  
357 that between 2015 and 2017, there appears to be a slightly declining pattern, with values  
358 of 9.5, 7.8, and 7.6 cases per 1,000 live births, respectively. Starting from 2018, it  
359 increased to 10.4 per 1,000 live births and followed an increasing trend in 2019 (12.1 per  
360 1,000 live births). In 2020, the indicator seems to decrease, showing a ratio of 10.4 per  
361 1,000 live births; however, what we could be witnessing is a decline in admissions of  
362 pregnant women and postpartum women, caused by the COVID-19 pandemic. As for  
363 2021, a significant difference in the maternal morbidity ratio can be observed, which  
364 recorded a ratio of 16.5 per 1,000 live births.

365

366

367 **Figure 1: Severe maternal morbidity ratio and number of cases of severe**  
368 **maternal morbidity, Dominican Republic, 2015-2021**

369 **Source:** National Epidemiological Surveillance System (SINAVE), Health Situation Analysis Directorate (DASIS), Department of  
370 Biostatistics (DB), 2015-2021.

371 **Note:** Number of cases of extreme maternal morbidity within the bars.

372

373

## 374 **Maternal Mortality Ratio (MMR)**

375 During the period 2015 to 2021, a total of 1,325 maternal deaths were recorded in the  
376 National Epidemiological Surveillance System (SINAVE), corresponding to women aged  
377 10 to 49 residing in the Dominican Republic.

378 Figure 2 shows the changes in maternal mortality during the period 2015-2021. The initial  
379 years did not present significant changes, with the MMR in 2015 being 115.3 maternal  
380 deaths per 100,000 live births, followed by an MMR of 102.5 per 100,000 live births. For  
381 the following two years, higher rates were recorded, specifically in 2017 with an MMR of  
382 111.3 maternal deaths per 100,000 live births and 2018 with an MMR of approximately  
383 110.0 maternal deaths per 100,000 live births. Regarding the year 2019, it began to show  
384 a decline with an MMR of 91.4 per 100,000 live births, representing a decrease in the ratio  
385 of 18.6% compared to 2018.

386 Additionally, we can highlight in this graph the trend line with two branches that diverge  
387 in the years 2020 and 2021 showing a simulation. In blue, the maternal mortality ratio for  
388 the period with maternal deaths including COVID-19 cases in 2020 and 2021 is presented,  
389 while in orange, starting from 2019, are the MMRs for 2020 and 2021, but in this case,  
390 excluding maternal deaths due to COVID-19.

391 Regarding the MMR excluding COVID-19 cases (orange line, Figure 2), based on a  
392 counterfactual scenario, in the years 2020 and 2021, there would have been an MMR of  
393 101.7 and 115.9 maternal deaths per 100,000 live births, respectively, values that would  
394 have been close to the average MMR in the period 2015-2019 (dotted red line). In other  
395 words, the evolution of the MMR for the period 2015-2021, without COVID-19 cases,  
396 pointed to a stagnant pattern, as oscillations around similar values were observed.

397 **Figure 2. Maternal Mortality Ratio, Dominican Republic, 2015-2021**

398 **Source:** National Epidemiological Surveillance System (SINAVE), Health Situation Analysis Directorate (DASIS), Department of  
399 Biostatistics (DB), 2015-2021.

400 **Note:** Number of maternal deaths within the bars.

401

402 Exiting the counterfactual scenario, including all reported cases (blue line, Figure 2), a  
403 notable increase in the MMR for the years 2020 and 2021 compared to previous years is  
404 observed, with this being 124.2 and 153.7 maternal deaths per 100,000 live births,  
405 respectively, indicating a significant rise in the indicator for the latter year.

406 **Causes of Maternal Deaths**

407 The analysis of the distribution of maternal mortality according to causes of death in the  
408 for the period 2015-2021 is presented in Figure 3. The following characteristics are  
409 observed: direct obstetric causes are responsible for more than 70% of maternal deaths  
410 from 2015 to 2020, except for the year 2021, which registred 62.5% of maternal deaths.  
411 On the other hand, indirect obstetric causes remained constant from 2015 to 2017,  
412 showing values close to 27%, while in the years 2018 and 2019 they decreased to 23.4%  
413 and 19.7% respectively. Regarding 2020 and 2021, there was a considerably high  
414 increase of 29.3% and 37.5% respectively.

415

416 **Figure 3. Percentage distribution of maternal mortality according to causes of**  
417 **Maternal deaths per year, Dominican Republic, 2015-2021**

418

419 **Source:** National Epidemiological Surveillance System (SINAVE).

420 Considering the literature regarding obstetric transition, there is a predominance of direct  
421 obstetric causes in all years, the most easily preventable. Within direct maternal causes,  
422 the group of edema, proteinuria and hypertensive disorders in pregnancy, childbirth and  
423 the puerperium predominates, ranging from 21.3% to 38.7%, followed by antepartum,  
424 intrapartum, and postpartum hemorrhage, and other complications of the postpartum  
425 period.

426 The role of pre-existing conditions is highlighted in indirect mortality, which is more  
427 difficult to reduce. In this regard, this subcategory presents proportions of 2.7% in 2015,  
428 0.5% in 2017, and 1.2% in 2019; no cases of maternal death under this cause of death  
429 were recorded in 2016 and 2019. However, for the years corresponding to the COVID-19  
430 pandemic, the proportion of cases under this category corresponds to 18.1% and 24.6%  
431 for the years 2020 and 2021, respectively. In numbers, in 2020, 39 cases of maternal  
432 deaths were registered under this cause, while in 2021, 67 cases of maternal deaths  
433 classified as COVID-19 were recorded.

434 The MMR due to direct obstetric causes was of 84 maternal deaths per 100,000 live  
435 births in 2015 (Table 2). In comparison, in 2021, the number was 96.1 maternal deaths  
436 per 100,000 live births. During the period, there was an increase of 12.1 maternal deaths  
437 due to direct obstetric causes per 100,000 live births. Maternal mortality is high  
438 regardless of COVID-19. The MMR due to "other viral diseases complicating pregnancy,  
439 childbirth, and the puerperium," which in the years before the COVID-19 pandemic (2015-  
440 2019) had shown a maximum value of 3.1 deaths per 100,000 live births (in 2015). In  
441 2020, it reached 22.5 deaths per 100,00 live births, peaking in 37.9 in 2021.

442

443 **Table 2. Maternal Mortality Ratio by Specific Cause per Year, Dominican Republic,**  
 444 **2015-2021**

| Causes of maternal deaths                                                                 | Year of death |             |             |             |             |             |             |
|-------------------------------------------------------------------------------------------|---------------|-------------|-------------|-------------|-------------|-------------|-------------|
|                                                                                           | 2015          | 2016        | 2017        | 2018        | 2019        | 2020        | 2021        |
|                                                                                           | 5             | 6           | 7           | 8           | 9           | 0           |             |
| <b>Direct causes</b>                                                                      | <b>84.0</b>   | <b>74.0</b> | <b>80.8</b> | <b>84.2</b> | <b>73.4</b> | <b>87.8</b> | <b>96.1</b> |
| Edema, proteinuria and hypertensive disorders in pregnancy, childbirth and the puerperium | 31.3          | 30.2        | 39.3        | 38.9        | 35.4        | 39.3        | 32.8        |
| Pregnancy with abortive outcome                                                           | 6.1           | 5.9         | 9.4         | 5.3         | 7.4         | 8.7         | 8.5         |
| Hemorrhage in early pregnancy, antepartum and postpartum                                  | 11.0          | 10.7        | 11.1        | 8.4         | 6.3         | 13.9        | 11.3        |
| Obstetric death of unspecified cause                                                      | 9.2           | 10.1        | 3.9         | 7.9         | 5.8         | 16.8        | 12.4        |
| Other complications of pregnancy and childbirth                                           | 2.5           | 1.8         | 2.8         | 4.2         | 3.2         | 2.3         | 19.2        |
| Complications predominantly related to the puerperium                                     | 13.5          | 5.9         | 8.3         | 10.5        | 10.6        | 3.5         | 8.5         |
| Sepsis and other puerperal infections                                                     | 10.4          | 9.5         | 6.1         | 8.9         | 4.8         | 3.5         | 3.4         |
| <b>Indirect causes</b>                                                                    | <b>31.3</b>   | <b>28.4</b> | <b>30.4</b> | <b>25.8</b> | <b>18.0</b> | <b>36.4</b> | <b>57.6</b> |
| Death from any obstetric cause                                                            | 23.9          | 24.3        | 23.2        | 23.7        | 15.3        | 11.0        | 17.0        |
| Human immunodeficiency virus [HIV] disease                                                | 4.3           | 4.1         | 6.6         | 2.1         | 1.6         | 2.9         | 2.8         |
| Other viral diseases complicating pregnancy, childbirth and the puerperium                | 3.1           | 0.0         | 0.6         | 0.0         | 1.1         | 22.5        | 37.9        |

|                            |             |             |             |             |             |             |              |
|----------------------------|-------------|-------------|-------------|-------------|-------------|-------------|--------------|
|                            | <b>115.</b> | <b>102.</b> | <b>111.</b> | <b>110.</b> |             | <b>124.</b> |              |
|                            |             |             |             |             | <b>91.4</b> |             | <b>153.7</b> |
| <b>All maternal deaths</b> | <b>3</b>    | <b>5</b>    | <b>3</b>    | <b>0</b>    |             | <b>2</b>    |              |

445

446 **Source:** National Epidemiological Surveillance System (SINAVE)

447

448

449 Additionally, the MMR for "anteartum, intrapartum, and postpartum hemorrhage" and  
 450 "obstetric death of unspecified cause" show an increase in 2020 of 13.9 and 16.8,  
 451 respectively. The MMR for other complications of pregnancy and childbirth, which in the  
 452 period from 2015 to 2020 showed values between 1.8 and 4.2, however, increased to  
 453 19.2 deaths per 100,000 live births in 2021.

454

455 **Contextual sociodemographic of maternal deaths**

456 Figure 4 presents the spatio-temporal evolution of the maternal mortality ratio for each  
 457 of the provinces in the Dominican Republic for the period 2015 to 2021, in addition to the  
 458 period average. Thus, despite the Dominican Republic presenting a considerably high  
 459 maternal mortality ratio, the national average tends to conceal the heterogeneity of the  
 460 health situation within the country (8).

461 **Figure 4. Maternal Mortality Ratio by province of residence, Dominican**  
 462 **Republic, 2015-2021**

463 **Source:** National Epidemiological Surveillance System (SINAVE).



464 The analysis by provinces allows identifying the locations with the highest ratios and,  
 465 based on this, prioritizing them for further analysis and identifying possible associated  
 466 factors. The national average of the maternal mortality ratio for the period 2015-2021  
 467 shows that the provinces Independencia (MMR: 364/100,000 live births), Monte Cristi  
 468 (MMR: 232.7/100,000 live births), and Pedernales (MMR: 227/100,000 live births) showed  
 469 the highest levels of this indicator. On the other hand, the provinces Distrito Nacional  
 470 (MMR: 44.1/100,000 live births), Hermanas Mirabal (MMR: 74.6/100,000 live births), and  
 471 Santiago (MMR: 77.8/100,000 live births) presented the lowest levels in relation to the  
 472 maternal mortality ratio.

473  
 474 In Table 3, some sociodemographic characteristics of women who presented conditions  
 475 of severe maternal mortality or morbidity during the period 2015-2021, captured by  
 476 SINAVE, are shown. In general terms, around 10% of these women died due to maternal  
 477 mortality during the period.

478 **Table 3. Sociodemographic Characteristics of Women aged 10 to 49 who**  
 479 **Presented Conditions of MM or SMM, Dominican Republic, 2015-2021**

480  
 481

| Characteristics         | Maternal deaths        |                       | Total<br>N=14,655 (100%) |
|-------------------------|------------------------|-----------------------|--------------------------|
|                         | No<br>N=13,224 (90.2%) | Yes<br>N=1,431 (9.8%) |                          |
| <b>Age group, n (%)</b> |                        |                       |                          |
| 10_19                   | 3001 (22.7%)           | 202 (14.1%)           | 3203 (21.9%)             |
| 20_29                   | 6409 (48.5%)           | 641 (44.8%)           | 7050 (48.1%)             |

|                                                      |               |              |               |
|------------------------------------------------------|---------------|--------------|---------------|
| 30_39                                                | 3434 (26.0%)  | 513 (35.8%)  | 3947 (26.9%)  |
| 40_49                                                | 380 (2.9%)    | 75 (5.2%)    | 455 (3.1%)    |
| <b>Pregnant, n (%)</b>                               |               |              |               |
| No                                                   | 4172 (31.5%)  | 398 (27.8%)  | 4570 (31.2%)  |
| Yes                                                  | 9051 (68.4%)  | 1032 (72.1%) | 10083 (68.8%) |
| Missing                                              | 1 (0.0%)      | 1 (0.1%)     | 2 (0.0%)      |
| <b>Residing in border provinces, n (%)</b>           |               |              |               |
| No                                                   | 12530 (94.8%) | 1352 (94.5%) | 13882 (94.7%) |
| Yes                                                  | 692 (5.2%)    | 78 (5.5%)    | 770 (5.3%)    |
| Missing                                              | 2 (0.0%)      | 1 (0.1%)     | 3 (0.0%)      |
| <b>Nationality, n (%)</b>                            |               |              |               |
| Dominican                                            | 10837 (81.9%) | 1103 (77.1%) | 11940 (81.5%) |
| Haitian                                              | 2352 (17.8%)  | 324 (22.6%)  | 2676 (18.3%)  |
| Others                                               | 35 (0.3%)     | 4 (0.3%)     | 39 (0.3%)     |
| <b>Time of care within less than 24 hours, n (%)</b> |               |              |               |
| No                                                   | 4199 (31.8%)  | 636 (44.4%)  | 4835 (33.0%)  |
| Yes                                                  | 9025 (68.2%)  | 795 (55.6%)  | 9820 (67.0%)  |
| <b>Mobility for seeking care, n (%)</b>              |               |              |               |
| No                                                   | 9102 (68.8%)  | 936 (65.4%)  | 10038 (68.5%) |
| Yes                                                  | 4120 (31.2%)  | 494 (34.5%)  | 4614 (31.5%)  |
| Missing                                              | 2 (0.0%)      | 1 (0.1%)     | 3 (0.0%)      |
| <b>Infected with Covid-19 during the pandemic*</b>   |               |              |               |
| No                                                   | 4,472 (94.7)  | 388 (79.2)   | 4,860 (93.3)  |
| Yes                                                  | 249 (5.3)     | 102 (20.8)   | 351 (6.7)     |
| <b>Comorbidities</b>                                 |               |              |               |
| No                                                   | 10398 (78.6%) | 1006 (70.3%) | 11404 (77.8%) |
| Yes                                                  | 2826 (21.4%)  | 425 (29.7%)  | 3251 (22.2%)  |
| <b>Year of attention</b>                             |               |              |               |
| 2015                                                 | 1547 (11.7%)  | 190 (13.3%)  | 1737 (11.9%)  |

|      |              |             |              |
|------|--------------|-------------|--------------|
| 2016 | 1309 (9.9%)  | 172 (12.0%) | 1481 (10.1%) |
| 2017 | 1382 (10.5%) | 203 (14.2%) | 1585 (10.8%) |
| 2018 | 1980 (15.0%) | 208 (14.5%) | 2188 (14.9%) |
| 2019 | 2285 (17.3%) | 168 (11.7%) | 2453 (16.7%) |
| 2020 | 1807 (13.7%) | 220 (15.4%) | 2027 (13.8%) |
| 2021 | 2914 (22.0%) | 270 (18.9%) | 3184 (21.7%) |

482 **Source:** National Epidemiological Surveillance System (SINAVE)

483 **Note:** \*for the denominator, cases for 2020 and 2021 were used.

484

485 Around 2 out of 10 women were of Haitian nationality (18.3%), with this proportion being  
486 even higher among women who lost their lives due to maternal causes (22.6%). It is worth  
487 noting that, while other nationalities are observed, this proportion is relatively low,  
488 reaching less than 1% in the data. Among all female inhabitants of the Dominican  
489 Republic, it is estimated that only 6.2% are Haitian migrants, and 0.7% are of other  
490 nationalities (64). Among live births, 13% are children of Haitian women, and 0.9% are  
491 children of women of other nationalities (65).

492

493 In Table 3 also, clinical and health care-related characteristics are showed. Regarding  
494 comorbidities present in this population, it was reported that 22.2% of these women had  
495 some comorbidity, with this proportion considerably higher (29.7%) in the group of  
496 women who died.

497 In general terms, the average length of stay was 1.30 days (SD = 4.54); however, the  
498 average length of stay for women who died was 3.19 days (SD = 8.35). It is observed that  
499 nearly 7 out of 10 women (67.0%) received care within the same day; however, this

500 proportion decreases in the group of women who died (close to 5 out of 10 women, or  
501 55.6%).

502 Regarding mobility in seeking care, peregrination, we can observe that 3 out of 10 women  
503 (31.5%) received care in a province different from the one reported as their province of  
504 residence, a proportion that in the group of women who died, turned out to be slightly  
505 higher (34.5%). During the years 2020 and 2021, in general terms, 6.7% of these women  
506 reported having been infected; however, this proportion is 3.1 times higher in the group  
507 of women who died (20.8%).

508 In the adjusted models, as can be seen in Table 4, comparing to the group age 10-19, the  
509 higher the women's age, the highest the chance of mortality. Other individual  
510 characteristics also increases the risk, such as being of Haitian origin (36.7%, p-value <  
511 0.001) being pregnant (17.8%, p-value = 0.024) and presenting comorbidities (76,2%, p-  
512 value < 0.001). Regarding characteristics related to the health care system, receiving care  
513 on the same day symptoms began is considered a protective factor against maternal  
514 mortality (p-value = 0.024), reducing the risk of death by 33.2%.

515

516

517

518

519

520

**Table 4. Multivariate model of association for maternal mortality using severe maternal morbidity cases as reference.**

| Variables                                                  | Model 1 * |                  | Model 2 ** |                  | Model 3 ** |                  |
|------------------------------------------------------------|-----------|------------------|------------|------------------|------------|------------------|
|                                                            | OR        | P value          | OR         | P value          | OR         | P value          |
| <b>Individual Level</b>                                    |           |                  |            |                  |            |                  |
| Age group (Ref: 10-19 years)                               |           |                  |            |                  |            |                  |
| 20-29 years                                                | 1.436     | <b>&lt;0.001</b> | 1.491      | <b>&lt;0.001</b> | 1.494      | <b>&lt;0.001</b> |
| 30-39 years                                                | 2.054     | <b>&lt;0.001</b> | 2.145      | <b>&lt;0.001</b> | 2.147      | <b>&lt;0.001</b> |
| 40-49 years                                                | 2.855     | <b>&lt;0.001</b> | 2.933      | <b>&lt;0.001</b> | 2.939      | <b>&lt;0.001</b> |
| Pregnant (Ref: No)                                         | 1.078     | 0.282            | 1.182      | <b>0.021</b>     | 1.178      | <b>0.024</b>     |
| Residing in border provinces (Ref: No)                     | 0.640     | 0.424            | 1.041      | 0.917            | 0.293      | 0.098            |
| Nationality (Ref: Dominican)                               |           |                  |            |                  |            |                  |
| Haitian                                                    | 1.303     | <b>&lt;0.001</b> | 1.360      | <b>&lt;0.001</b> | 1.367      | <b>&lt;0.001</b> |
| Others                                                     | 0.953     | 0.939            | 0.850      | 0.798            | 0.849      | 0.797            |
| Time of care within less than 24 hours (ref: No) (Ref: No) |           |                  |            |                  |            |                  |
| No)                                                        | 0.651     | <b>&lt;0.001</b> | 0.672      | <b>&lt;0.001</b> | 0.668      | <b>&lt;0.001</b> |
| Mobility for seeking care (Ref: No)                        | 0.940     | 0.402            | 0.857      | <b>0.045</b>     | 0.858      | <b>0.045</b>     |

|                                                                        |       |                  |       |                  |       |                  |
|------------------------------------------------------------------------|-------|------------------|-------|------------------|-------|------------------|
| Type of care (Ref: Hospitalization)                                    |       |                  |       |                  |       |                  |
| Outpatient                                                             | 7.155 | <b>&lt;0.001</b> | 6.921 | <b>&lt;0.001</b> | 6.950 | <b>&lt;0.001</b> |
| At home                                                                | 3.190 | <b>0.006</b>     | 3.124 | <b>0.011</b>     | 3.102 | <b>0.011</b>     |
| Referred                                                               | 0.650 | <b>0.026</b>     | 0.627 | <b>0.028</b>     | 0.620 | <b>0.025</b>     |
| Comorbidities (Ref: No)                                                |       |                  |       |                  |       |                  |
|                                                                        | 1.735 | <b>&lt;0.001</b> | 1.760 | <b>&lt;0.001</b> | 1.762 | <b>&lt;0.001</b> |
| Infected with Covid-19 during the pandemic (Ref: No)                   |       |                  |       |                  |       |                  |
|                                                                        | 3.683 | <b>&lt;0.001</b> | 4.750 | <b>&lt;0.001</b> | 4.779 | <b>&lt;0.001</b> |
| Year of attention (Ref: 2015)                                          |       |                  |       |                  |       |                  |
| 2016                                                                   | -     | -                | 0.806 | 0.369            | 0.804 | 0.408            |
| 2017                                                                   | -     | -                | 0.688 | 0.139            | 0.668 | 0.131            |
| 2018                                                                   | -     | -                | 0.548 | <b>0.032</b>     | 0.440 | <b>0.004</b>     |
| 2019                                                                   | -     | -                | 0.392 | <b>0.001</b>     | 0.326 | <b>0.000</b>     |
| 2020                                                                   | -     | -                | 0.482 | <b>0.019</b>     | 0.399 | <b>0.005</b>     |
| 2021                                                                   | -     | -                | 0.430 | <b>0.017</b>     | 0.296 | <b>&lt;0.001</b> |
| Interaction between residing in border provinces and Year of attention |       |                  |       |                  |       |                  |
| Residing in border provinces : year 2016                               | -     | -                | -     | -                | 0.838 | 0.817            |
| Residing in border provinces : year 2017                               | -     | -                | -     | -                | 1.050 | 0.952            |

|                                          |   |   |   |   |        |              |
|------------------------------------------|---|---|---|---|--------|--------------|
| Residing in border provinces : year 2018 | - | - | - | - | 4.370  | 0.060        |
| Residing in border provinces : year 2019 | - | - | - | - | 3.536  | 0.133        |
| Residing in border provinces : year 2020 | - | - | - | - | 3.141  | 0.218        |
| Residing in border provinces : year 2021 | - | - | - | - | 13.774 | <b>0.004</b> |

**Provincial Level**

|                          |       |              |   |   |   |   |
|--------------------------|-------|--------------|---|---|---|---|
| Female-headed households | 0.080 | 0.296        | - | - | - | - |
| Urban residential area   | 0.050 | <b>0.045</b> | - | - | - | - |

522 "-" Coefficients were not included in the model to avoid collinearity between year of attention variable and both provincial-level variables

523 \* Random effects were added at the provincial level for female-headed households and urban residential area

524 \*\* Random effects related to the year of attention were introduced at the provincial level.

525

526

527

528





529 When comparing women who received outpatient care with women who got  
530 hospitalized, the former have a 6.9 times higher risk of dying ( $p$ -value  $< 0.001$ ). Similarly,  
531 receiving care at home is also considered a risk factor for mortality (Odds: 3.10  $p$ -value =  
532 0.006) compared to women who were hospitalized. Conversely, receiving care through  
533 referrals (women who were already hospitalized or received care at another facility) is  
534 considered a protective factor against mortality ( $p$ -value = 0.026), reducing the risk of  
535 maternal death by 37.8%. Mobility for seeking care is associated with less maternal  
536 mortality ( $p$ -value = 0.045), reducing the risk of maternal death by 14.2%.

537 With regard to characteristics associated with the context of the COVID-19 pandemic,  
538 women in SMM condition who reported being infected with the virus have a 4.8 times  
539 higher risk of dying from maternal death than women who were not infected ( $p$ -value  $<$   
540 0.001). Taking 2015 as a reference year, all years (2016 to 2021) demonstrate fewer  
541 chances of observing maternal mortality, being significant for the years 2018 ( $p$ -value =  
542 0.032), 2019 ( $p$ -value  $< 0.001$ ), 2020 ( $p$ -value  $< 0.049$ ), and 2021 ( $p$ -value  $< 0.072$ ). This  
543 can be translated as an improvement in care; however, this improvement in care was not  
544 general for all women, as observed in the interactions of model 3. In this adjusted models,  
545 the provinces located in the southwest region of the Dominican Republic, the ones that  
546 border the Republic of Haiti and are the ones with the worst socioeconomic conditions,  
547 are associated with a 13 times increase in the odds of dying in the year 2021 ( $p$ -value =  
548 0.002) and indicating a 13.8 times higher risk for women residing in these border  
549 provinces compared to women who do not reside in these provinces.

## 550 **Discussion and Conclusion**

551 The first objective of this study was to estimate severe maternal morbidity ratios and  
552 maternal mortality ratios for the period 2015-2021, verifying if, starting from 2020, there  
553 was a change in the observed behavior for the period. We find that during the years 2015  
554 to 2019, severe morbidity showed a slightly pronounced pattern of increase, which could  
555 be attributed to the improvement in the surveillance protocol of the SINAVE; however, in  
556 2020, the indicator seems to decrease, showing a ratio of 10.4 for every 1,000 live births.  
557 The first hypothesis suggests a decrease in the income of pregnant women and  
558 puerperal women, caused by the COVID-19 pandemic, which according to Rivera  
559 Alvarado (66), impacted access to healthcare services leading to a parallel crisis in sexual  
560 and reproductive health and a consequent exacerbation of social inequalities.

561 In the same vein, OPS (16) stated that COVID-19 caused devastating impacts on women,  
562 pregnancy care, and newborn care, with the virus interrupting services in almost half of  
563 the countries in the Americas. At the same time, it indicates that pregnant women are  
564 more vulnerable to respiratory infections such as COVID-19 and that if pregnant women  
565 become ill, they tend to develop more severe symptoms.

566 The second scenario regarding the decrease in SMMR in 2020 could be due to a change  
567 in the detection of severe maternal morbidity cases. Recent research has shown  
568 evidence that problems arose in the notification and properly conducted diagnosis during  
569 the first year of COVID-19, causing a disruption in the 2020 data (67). In 2021, the  
570 indicator recorded a ratio of 16.5 for every 1,000 live births.

571 Regarding the results of the estimates of the Maternal Mortality Ratio for the period 2015  
572 to 2021 in the Dominican Republic, until the year 2018, the MMR did not present  
573 significant changes, that is, the evolution of this indicator seemed stagnant, except for

574 the year 2019, which decreased to an MMR of 91.4 for every 100,000 live births. The  
575 MMR for 2020 and 2021 compared to previous years shows a significant increase of  
576 124.2 and 153.7 maternal deaths per 100,000 live births, respectively, which can be  
577 directly linked to the COVID-19 pandemic. This increase in MMR associated with COVID-  
578 19 in the years 2020 and 2021 has also been recorded in other countries in Latin America  
579 and the Caribbean, such as Brazil. According to Valongueiro (68) in Rio de Janeiro,  
580 preliminary information for 2021 showed an MMR of 201.7 maternal deaths per 100,000  
581 live births, for an increase in MMR between 2019 and 2021 of 150%.

582 One way to measure the impact of the pandemic is to analyze excess mortality, that is,  
583 the level of mortality at a given time compared to recent trends or, in this case, the  
584 expected value (67). Adopting the practices carried out by Lima (67), when comparing  
585 the number of maternal deaths for the years 2020 and 2021 with the average for previous  
586 years (2015-2019) (188.8 deaths), we have an excess of 13.9% and 44.1% of maternal  
587 deaths in 2020 and 2021, respectively. Repeating this exercise to estimate the excess  
588 deaths for general mortality (all people, not just obstetric), using the data of registered  
589 deaths (65), for the years 2020 and 2021, an excess in general mortality of 6.1% and  
590 10.6% was recorded, respectively.

591 Direct obstetric causes account for more than 70% of maternal deaths from 2015 to  
592 2020, except for the year 2021, which showed 62.5% of maternal deaths. On the other  
593 hand, indirect obstetric causes from 2015 to 2017 remained constant, showing values  
594 close to 27%, while in 2018 and 2019 they decreased to 23.4% and 19.7%, respectively.  
595 The proportion of deaths caused by the subcategory "Other viral diseases that  
596 complicate pregnancy, childbirth, and the postpartum period" reached 18.1% and 24.6%

597 for the years 2020 and 2021, respectively. Concerning 2020 and 2021, indirect causes,  
598 such as the viral infections, had a considerably high increase of 29.3% and 37.5%,  
599 respectively. Despite the increase in indirect obstetric causes, according to Say (61),  
600 severe hemorrhages (mostly postpartum) and complications during childbirth are  
601 among the main complications that cause 75% of maternal deaths. Throughout the  
602 period there was an increase of 12.1 maternal deaths due to direct obstetric causes per  
603 100,000 live births, an increase that can be attributed to the disruptions that the  
604 healthcare system had due to the COVID-19 pandemic (67).

605 The results also show that women's age is considered a risk factor related to maternal  
606 mortality. The results also highlight the proportion of cases in adolescent women (21.9%),  
607 compatible with adolescent pregnancy rates in the Dominican Republic (63). At the other  
608 end of the age spectrum are women aged 40 to 49, representing about 3% of maternal  
609 and extreme maternal mortality cases. These results are related to those presented by  
610 Donoso and colleagues (69), which state that pregnancy at the extremes of reproductive  
611 age is a risk factor for maternal, perinatal, and infant morbidity and mortality.

612 Other findings are supported by the literature, such as the fact that complications or  
613 comorbidities may exist before pregnancy, but these worsen during gestation,  
614 particularly when not treated as part of women's healthcare (9,18,20,28). The results also  
615 highlight the importance of providing immediate care (28) for improving the chances of  
616 survival.

617 Thinking about the role of the social determinants of health for the maintenance of health  
618 inequalities (39), especially when it comes to sexual and reproductive health, this paper  
619 adds to the existing evidence that maternal mortality is higher in territories with higher

620 levels of multidimensional poverty or in localities with lower levels of human  
621 development. Patricio and Santos (8) show how the probability of a woman dying from  
622 causes related to pregnancy, childbirth, or the postpartum period in the most socially  
623 disadvantaged territories was around twice as high compared to the most socially  
624 favored territories. Our results revealed that being a resident of an international bordering  
625 area in 2021 multiplied the chances of dying by 13; and being of Haitian nationality carried  
626 out a 30.3% higher chance of incurring in maternal death compared to a woman of  
627 Dominican nationality. Knowing that economic level, race and ethnicity, religion, gender,  
628 education and occupation have an impact on health outcomes through intermediate  
629 determinants (41,70) leads to the assumption that there is an intersection of these  
630 factors in Haitian women, migrants, possibly of low income, residing in more  
631 disadvantaged localities. It is worth emphasizing that at the population level, the greatest  
632 migration received by the Dominican Republic is from Haitian citizens due to the  
633 proximity and vast social and economic differences that favor this situation (9). As the  
634 World Health Organization states, research on severe maternal morbidity can indicate  
635 the way to reduce high maternal mortality rates; however, more studies should be  
636 conducted that include social, economic, political, and health determinants in the  
637 Dominican Republic and more public policy is needed to address the sociodemographic  
638 and economic conditions of women in order to improve access to and use of health  
639 services.

640 The findings show that the pandemic brought up a catastrophic situation for maternal  
641 health. However, maternal mortality is high in the Dominican Republic regardless of  
642 COVID-19. In addition, there was an increase in poorly specified causes, so the numbers  
643 might be underestimated. As the country has not been able to experience a significant

644 reduction in maternal mortality without COVID-19 cases, it moves away from achieving  
645 the 2030 Agenda and the Sustainable Development Goals. (1)

## 646 REFERENCES

- 647 1. Organización Mundial de la Salud (OMS). Mortalidad materna. 2018. Mortalidad  
648 Materna.
- 649 2. Martín Vásquez JA. La mortalidad materna y perinatal en la República Dominicana.  
650 [Santo Domingo]: Universidad Nacional Pedro Henríquez Ureña UNPHU; 1983.
- 651 3. World Health Organization (WHO). Maternal mortality in 2005: estimates developed  
652 by WHO, UNICEF, UNFPA, and the World Bank. Geneva; 2007.
- 653 4. Souza JP, Cecatti JG, Haddad SM, Parpinelli MA, Costa ML, Katz L, et al. The WHO  
654 Maternal Near-Miss Approach and the Maternal Severity Index Model (MSI): Tools  
655 for Assessing the Management of Severe Maternal Morbidity. PLoS One. 2012 Aug  
656 29;7(8): e44129.
- 657 5. Zureick-Brown PS, Newby H, Chou D, Mizoguchi N, Say L, Suzuki E, et al. Elementos  
658 para comprender las tendencias mundiales de la mortalidad materna. Int Perspect  
659 Sex Reprod Health. 2014;(SPEC. ISSUE):13–23.
- 660 6. Organización Panamericana de la Salud (OPS). Clasificación Estadística  
661 Internacional de Enfermedades y Problemas Relacionados con la Salud.  
662 Washington, D.C.; 1992.
- 663 7. Díaz de León Ponce MA, Briones Garduño JC. La muerte materna indirecta en  
664 ocasiones puede ser directa o un incidente adverso. Medicina Crítica. 2014 Apr;  
665 XXVIII:95–9.

- 666 8. Santos Mercedes KD, Patricio Baldera J. Desigualdades sociales en la mortalidad  
667 materna, República Dominicana, 2016. *Ciencia y Salud*. 2023 Oct 14;7(3):23–36.
- 668 9. MISPAS M de SP y AS de la RD. Un vistazo a las desigualdades en Salud Materna,  
669 Infantil y Adolescente. Santo Domingo; 2016.
- 670 10. (PNUD) P de las NU para el D. Objetivos de Desarrollo del Milenio Informe de 2015.  
671 2015 Jul.
- 672 11. (MEPyD) M de EP y D. Objetivos de Desarrollo del Milenio: Informe de Seguimiento,  
673 2013. Santo Domingo; 2014 Feb.
- 674 12. World Bank. GDP per capita (current US\$) - Dominican Republic. (2021.). World  
675 Bank Open Data. 2021. GDP per capita (current US\$) - Dominican Republic.
- 676 13. El Fondo de las Naciones Unidas para la Infancia (UNICEF). "Más de un 80% de las  
677 muertes maternas y neonatales son evitables." 2021.
- 678 14. Westgren M, Pettersson K, Hagberg H, Acharya G. Severe maternal morbidity and  
679 mortality associated with COVID-19: The risk should not be downplayed. *Acta  
680 Obstet Gynecol Scand*. 2020 Jul 13;99(7):815–6.
- 681 15. Takemoto MLS, Menezes M de O, Andreucci CB, Nakamura-Pereira M, Amorim  
682 MMR, Katz L, et al. The tragedy of COVID-19 in Brazil: 124 maternal deaths and  
683 counting. *International Journal of Gynecology & Obstetrics*. 2020 Oct  
684 29;151(1):154–6.
- 685 16. Organización Mundial de la Salud (OMS), Organización Panamericana de la Salud  
686 (OPS). *Salud en las Américas*. 2021. *Salud en las Américas*.

- 687 17. Oficina Nacional de Estadística (ONE). Indicadores de crecimiento demográfico  
688 proyectados y estimados, 2000-2030. 2015. Indicadores de crecimiento  
689 demográfico proyectados y estimados, 2000-2030.
- 690 18. Organización Panamericana de la Salud (OPS), Organización Mundial de la Salud  
691 (OMS). Alerta epidemiológica COVID-19 durante el embarazo. 2020. Alerta  
692 Epidemiológica: COVID-19 durante el embarazo.
- 693 19. Fondo de Población de las Naciones Unidas (UNFPA), Centro de Estudios de  
694 Género Instituto Tecnológico de Santo Domingo (CEG/ INTEC), Ministerio de Salud  
695 Pública de la Republica Dominicana (MSP). Análisis de Género en la Mortalidad  
696 Materna de República Dominicana Resumen Ejecutivo. Santo Domingo; 2017.
- 697 20. (MISPAS) M de SP y AS de la RD. Evaluación de indicadores de resultados en el  
698 marco de la Alianza Nacional para Acelerar la Reducción de la Mortalidad Materna  
699 e Infantil. Santo Domingo; 2020 Mar.
- 700 21. Mahler H. THE SAFE MOTHERHOOD INITIATIVE: A CALL TO ACTION. The Lancet.  
701 1987 Mar;329(8534):668.
- 702 22. (MISPAS) M de SP y AS de la RD. Plan Estratégico Nacional para la Reducción de  
703 la Mortalidad Materna e Infantil 2012-2016. Santo Domingo; 2012 Nov.
- 704 23. Organización Mundial de la Salud (OMS). Guía de la OMS para la aplicación de la  
705 CIE-10 a las muertes ocurridas durante el embarazo, parto y puerperio: CIE-MM.  
706 Suiza; 2012.



- 707 24. Fuentes García ÁR, Pagés Mesa D, Hernández Cabrera J, Dominguez Blanco A,  
708 Crespo Hernández T, Suárez Ojeda R. Mortalidad materna: algunos factores a  
709 considerar 1986-1995. Rev Cubana Obstet Ginecol. 1998 May;24(2):80–5.
- 710 25. Navarro-Pérez CF, González-Jiménez E, Schmidt-RioValle J, Meneses-Echávez JF,  
711 Martínez-Torres J, Ramírez-Vélez R. Factores sociodemográficos y seguimiento  
712 prenatal asociados a la mortalidad perinatal en gestantes de Colombia. Nutr Hosp.  
713 2015 Sep; 32:1091–8.
- 714 26. van Roosmalen J, Zwart J. Severe acute maternal morbidity in high-income  
715 countries. Best Pract Res Clin Obstet Gynaecol. 2009 Jun;23(3):297–304.
- 716 27. Ferreira MES. Morbidade Materna Severa no Brasil: análise da incidência do Near  
717 Miss Materno, para as Unidades da Federação, no período entre 2010 e 2019  
718 [Acesso Aberto]. [Belo horizonte]: Universidade Federal de Minas Gerais; 2021.
- 719 28. Acelas-Granados DF, Orostegui A, Alarcón-Nivia MÁ. Factores de riesgo para  
720 morbilidad materna extrema en gestantes sin demora en la atención médica  
721 según la estrategia camino para la supervivencia. Rev Chil Obstet Ginecol.  
722 2016;81(3).
- 723 29. (MISPAS) M de SP y AS de la RD. Protocolo de Vigilancia Especial de Morbilidad  
724 Materna Extrema y Muerte Materna. Santo Domingo; 2019 Dec.
- 725 30. Oficina General de Epidemiología. La Mortalidad Materna en el Perú 1997-2002.  
726 Lima: Ministerio de Salud del Perú. Lima; 2003.

- 727 31. Urrunaga Barba WalterG, Valladares Tomasto AJ. CARACTERÍSTICAS CLÍNICAS  
728 Y EPIDEMIOLOGICAS DE LA MUERTE MATERNA. HOSPITAL REGIONAL  
729 DOCENTE TRUJILLO. Revista Salud, Sexualidad y Sociedad. 2011;3(4):1–10.
- 730 32. Organización para la Cooperación y Desarrollo Económico (OECD). COVID-19 na  
731 região da América Latina e Caribe: implicações sociais e econômicas e políticas  
732 prioritárias. 2020 Apr.
- 733 33. Alves AKR, Silva BBL da, Machado LFCB, Silva GB da, Amorim Filho JV, Serejo  
734 Júnior F das C da S, et al. Impacto e manejo obstétrico de pacientes grávidas  
735 infectadas pelo SARS-CoV-2. Research, Society and Development. 2022 Jan  
736 6;11(1):e28911124892.
- 737 34. Croda J, Oliveira WK de, Frutuoso RL, Mandetta LH, Baia-da-Silva DC, Brito-Sousa  
738 JD, et al. COVID-19 in Brazil: advantages of a socialized unified health system and  
739 preparation to contain cases. Rev Soc Bras Med Trop. 2020;53.
- 740 35. Organización Mundial de la Salud (OMS). Declaración de la OMS sobre tasas de  
741 cesárea. Resumen ejecutivo. 2015. p. 1–8 Declaración de la OMS sobre tasas de  
742 cesárea.
- 743 36. Diniz CSG, Cabral C da S. Reproductive health and rights, and public policies in  
744 Brazil: revisiting challenges during covid-19 pandemics. Glob Public Health. 2022  
745 Nov 2;17(11):3175–88.
- 746 37. Rodríguez Corredor ZA. Los determinantes sociales y su importancia para los  
747 profesionales de la salud. 2020 Oct.

- 748 38. Karolinski A, Mercer R, Micone P, Ocampo C, Salgado P, Szulik D, et al. Modelo para  
749 abordar integralmente la mortalidad materna y la morbilidad materna grave.  
750 Revista Panamericana de Salud Pública. 2015;37(4–5):351–9.
- 751 39. Solar O, Irwin A. A conceptual framework for action on the social determinants of  
752 health. Geneva; 2010.
- 753 40. Holmes JH, Lehman A, Hade E, Ferketich AK, Gehlert S, Rauscher GH, et al.  
754 Challenges for Multilevel Health Disparities Research in a Transdisciplinary  
755 Environment. Am J Prev Med. 2008 Aug;35(2): S182–92.
- 756 41. Hamal M, Dieleman M, De Brouwere V, de Cock Buning T. Social determinants of  
757 maternal health: a scoping review of factors influencing maternal mortality and  
758 maternal health service use in India. Public Health Rev. 2020 Dec 2;41(1):13.
- 759 42. World Health Organization (WHO), World Bank, United Nations Population Fund,  
760 United Nations Children’s Fund (UNICEF). Trends in maternal mortality: 1990 to  
761 2010 WHO, UNICEF, UNFPA and The World Bank estimates. Geneva; 2012.
- 762 43. Freyermuth Enciso G. Determinantes sociales en la Mortalidad Materna en México.  
763 REVISTA CONAMED. 2016 Jan;21(1):25–32.
- 764 44. Bambra C, Riordan R, Ford J, Matthews F. The COVID-19 pandemic and health  
765 inequalities. J Epidemiol Community Health (1978). 2020 Jun 13; jech-2020-  
766 214401.
- 767 45. Serapioni M, Hespanha P. A pandemia de COVID-19 e as desigualdades em saúde  
768 nos países do sul da Europa. E-cadernos CES. 2022;1–3.

- 769 46. Giannopoulou I, Tsobanoglou GO. COVID-19 pandemic: challenges and  
770 opportunities for the Greek health care system. *Ir J Psychol Med*. 2020 Sep  
771 14;37(3):226–30.
- 772 47. Alves J, Soares P, Rocha JV, Santana R, Nunes C. Evolution of inequalities in the  
773 coronavirus pandemics in Portugal: an ecological study. *Eur J Public Health*. 2021  
774 Oct 26;31(5):1069–75.
- 775 48. Marí-Dell’Olmo M, Gotsens M, Pasarín MI, Rodríguez-Sanz M, Artazcoz L, Garcia de  
776 Olalla P, et al. Socioeconomic Inequalities in COVID-19 in a European Urban Area:  
777 Two Waves, Two Patterns. *Int J Environ Res Public Health*. 2021 Jan  
778 30;18(3):1256.
- 779 49. Jensen N, Kelly AH, Avendano M. The COVID-19 pandemic underscores the need  
780 for an equity-focused global health agenda. *Humanit Soc Sci Commun*. 2021 Jan  
781 18;8(1):15.
- 782 50. Instituto Nacional de Estadística y Censos. Estimación de la Razón de Mortalidad  
783 Materna en el Ecuador. Ecuador; 2017 Jun.
- 784 51. Cárdenas-Cárdenas LM, Cotes-Cantillo K, Chaparro-Narváez PE, Fernández-Niño  
785 JA, Paternina-Caicedo A, Castañeda-Orjuela C, et al. Maternal Mortality in Colombia  
786 in 2011: A Two Level Ecological Study. *PLoS One*. 2015 Mar 18;10(3): e0118944.
- 787 52. Instituto Nacional de Salud. Mortalidad evitable en Colombia para 1998-2011.  
788 Bogotá; 2014 Jun.

- 789 53. Mordan M, Flaz S, Rosario E, Peguero M. Morbilidad materna extrema en pacientes  
790 de un Hospital Materno Infantil en República Dominicana. Revista Cubana de  
791 Obstetricia y Ginecología. 2018;44(3):1–8.
- 792 54. Maia LT de S, Souza WV de, Mendes A da CG. Determinantes individuais e  
793 contextuais associados à mortalidade infantil nas capitais brasileiras: uma  
794 abordagem multinível. Cad Saude Publica. 2020;36(2).
- 795 55. Peña E, Patricio Baldera J, Rodríguez J. AVANCES EN EL REGISTRO DE NACIDOS  
796 VIVOS AL 2018. Buenos Aires; 2019 Aug.
- 797 56. Ruiz Salguero MT, Miller T, Márquez L, Villarroel MC. Hacia la armonización de las  
798 estimaciones de mortalidad materna en América Latina: actualización y  
799 ampliación a los 20 países de la región. Santiago; 2015 Nov.
- 800 57. Secretaría de Estado de Salud Pública y Asistencia Social (SESPAS), Centro de  
801 Investigación y Estudios de Gerencia en Salud CEDIGES/UCSD. Estudio de la  
802 Exclusión Social en Salud y de los Sistemas de Protección Social en Salud de la  
803 República Dominicana. Santo Domingo; 2001 Nov.
- 804 58. Worldometers. COVID live - Coronavirus statistics - worldometer.  
805 Worldometers.Info. 2023. COVID live - Coronavirus statistics - worldometer.  
806 Worldometers.Info.
- 807 59. SUBDIRECCIÓN GENERAL DE INFORMACIÓN SANITARIA. ANUNCIO DE CAMBIO  
808 Y NUEVA NORMATIVA PARA LA CODIFICACIÓN DE LA INFECCIÓN POR SARS-  
809 CoV-2 (COVID-19). Madrid; 2020.

- 810 60. Araujo De Lacerda M, Pimenta F, Elaboração J, Paula A, Viegas B, De E, et al.  
811 Prefeito Municipal ANÁLISE DOS INDICADORES DO NÍVEL MUNICIPAL CICLO DE  
812 VIDA: GESTANTE.
- 813 61. Say L, Chou D, Gemmill A, Tunçalp Ö, Moller AB, Daniels J, et al. Global causes of  
814 maternal death: a WHO systematic analysis. *Lancet Glob Health*. 2014  
815 Jun;2(6):e323–33.
- 816 62. Oficina Nacional de Estadística (ONE). *Conceptos Demográficos Básicos*. Santo  
817 Domingo; 2006 Feb.
- 818 63. Oficina Nacional de Estadística (ONE). *Encuesta Nacional de Hogares de*  
819 *Propósitos Múltiples ENHOGAR 2018*. (2019). *Encuesta Nacional de Hogares de*  
820 *Propósitos Múltiples ENHOGAR 2018*.
- 821 64. Oficina Nacional de Estadística (ONE). *Segunda Encuesta Nacional de Inmigrantes*  
822 *en la República Dominicana ENI 2017 Informe General*. Santo Domingo; 2018.
- 823 65. Oficina Nacional de Estadística (ONE). *Anuario de Estadísticas Vitales 2021*. Santo  
824 Domingo; 2022 Jul.
- 825 66. Rivera Alvarado AC. Comisión Económica para América Latina y el Caribe (CEPAL).  
826 2020. *Los efectos de la pandemia del COVID-19: desafíos para la salud sexual y*  
827 *reproductiva en el contexto del logro del desarrollo sostenible. La COVID-19 y las*  
828 *desigualdades sociales, 2020*.
- 829 67. Lima EEC, Vilela EA, Peralta A, Rocha M, Queiroz BL, Gonzaga MR, et al.  
830 *Investigating regional excess mortality during 2020 COVID-19 pandemic*

- 831 in selected Latin American countries. *Journal of Population Sciences*. 2021 Nov  
832 3;77(30).
- 833 68. Valongueiro S. Brasil: Morte materna em contexto de Covid-19 (2020-2021).  
834 *Sexuality Policy Watch* . 2021 Oct;1–9.
- 835 69. Donoso E, Carvajal JA, Vera C, Poblete JA. La edad de la mujer como factor de  
836 riesgo de mortalidad materna, fetal, neonatal e infantil. *Rev Med Chil*. 2014  
837 Feb;142(2):168–74.
- 838 70. Caballero González E, Moreno Gelis M, Sosa Cruz ME, Figueroa EM, Vega  
839 Hernández M, Columbié Pérez L de A. Los determinantes sociales de la salud y sus  
840 diferentes modelos explicativos. *Revista de Información para la Dirección en Salud*.  
841 2012;8(15).
- 842

**Figure 1: Severe maternal morbidity ratio and number of cases of severe maternal morbidity, Dominican Republic, 2015-2021**

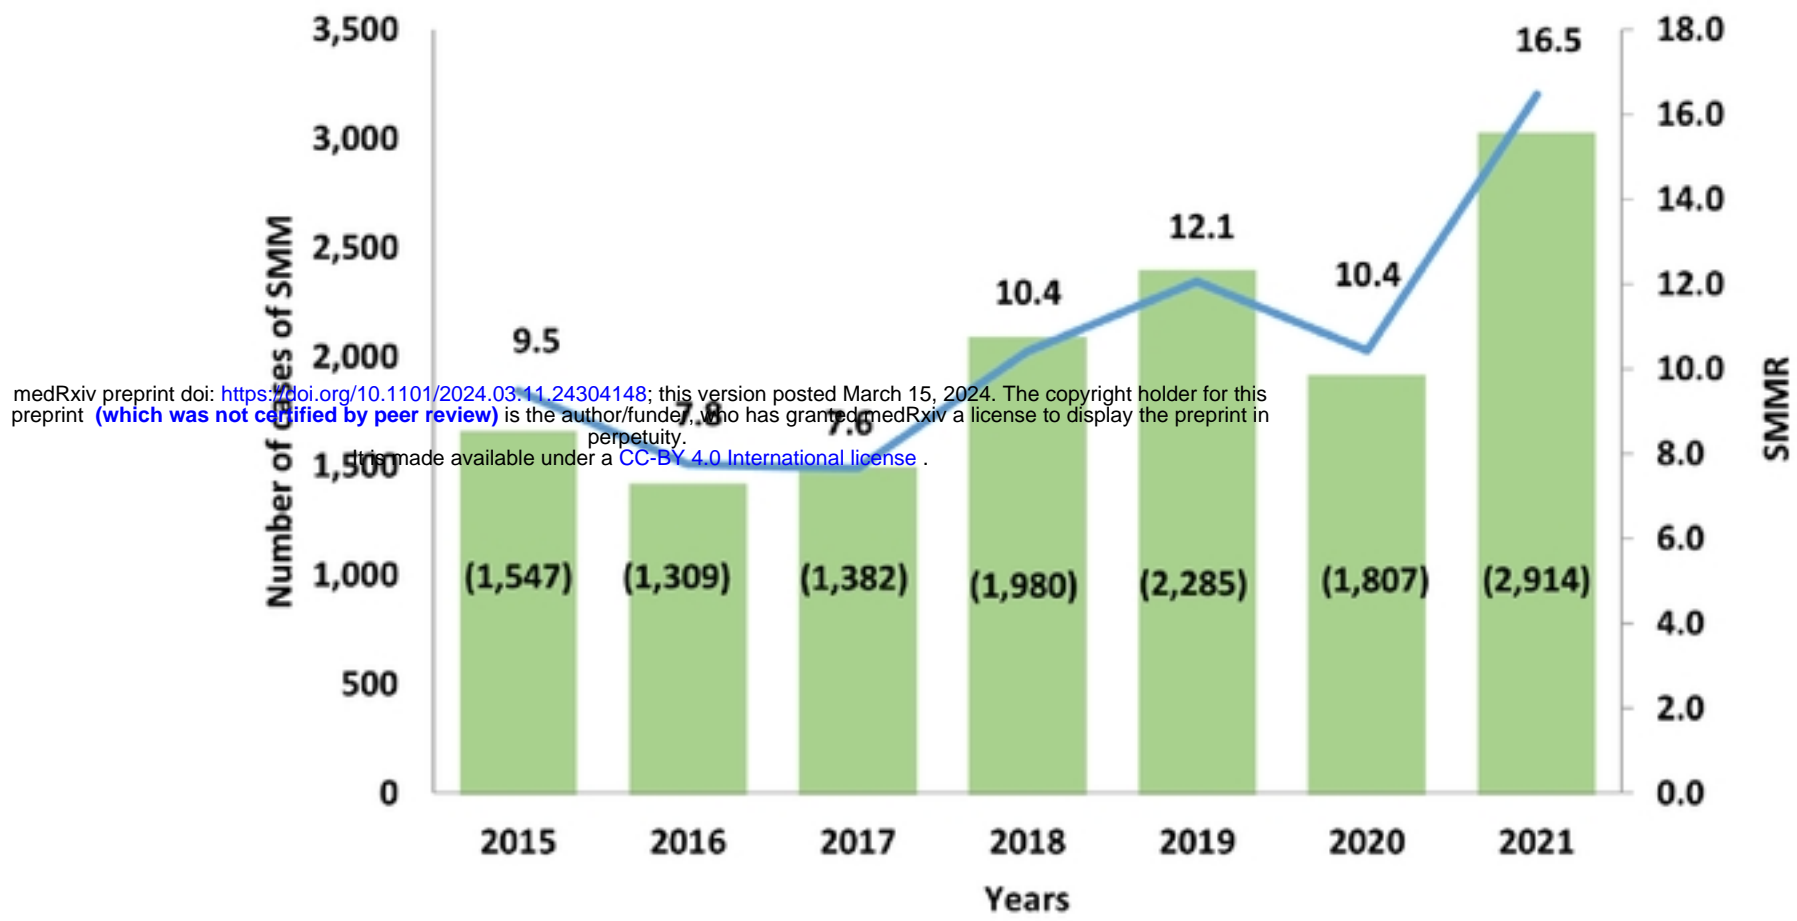

**Source:** National Epidemiological Surveillance System (SINAVE), Health Situation Analysis Directorate (DASIS), Department of Biostatistics (DB), 2015-2021.

**Note:** Number of cases of extreme maternal morbidity within the bars.



**Figure 2. Maternal Mortality Ratio, Dominican Republic, 2015-2021**

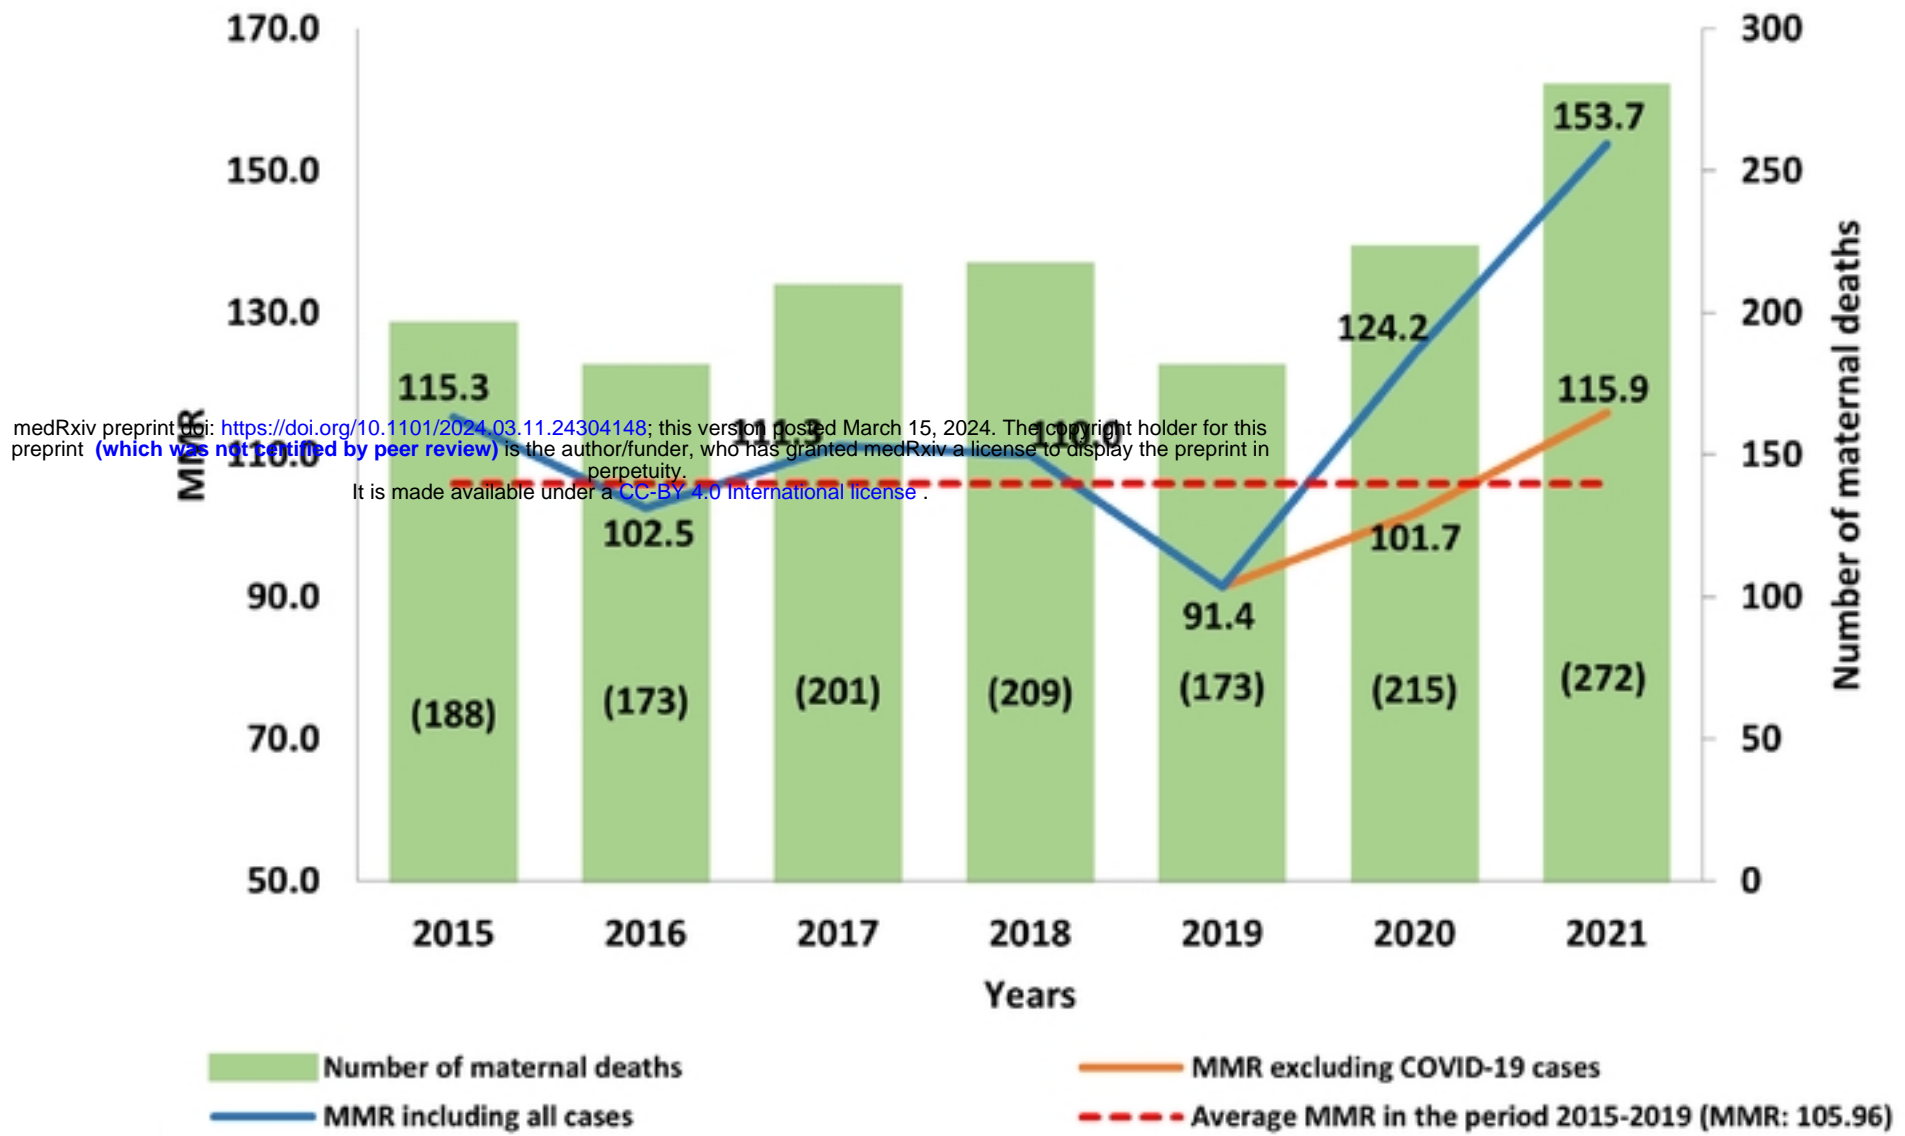

**Source:** National Epidemiological Surveillance System (SINAVE), Health Situation Analysis Directorate (DASIS), Department of Biostatistics (DB), 2015-2021.

**Note:** Number of maternal deaths within the bars.

**Figure 3. Percentage distribution of maternal mortality according to causes of Maternal deaths per year, Dominican Republic, 2015-2021**

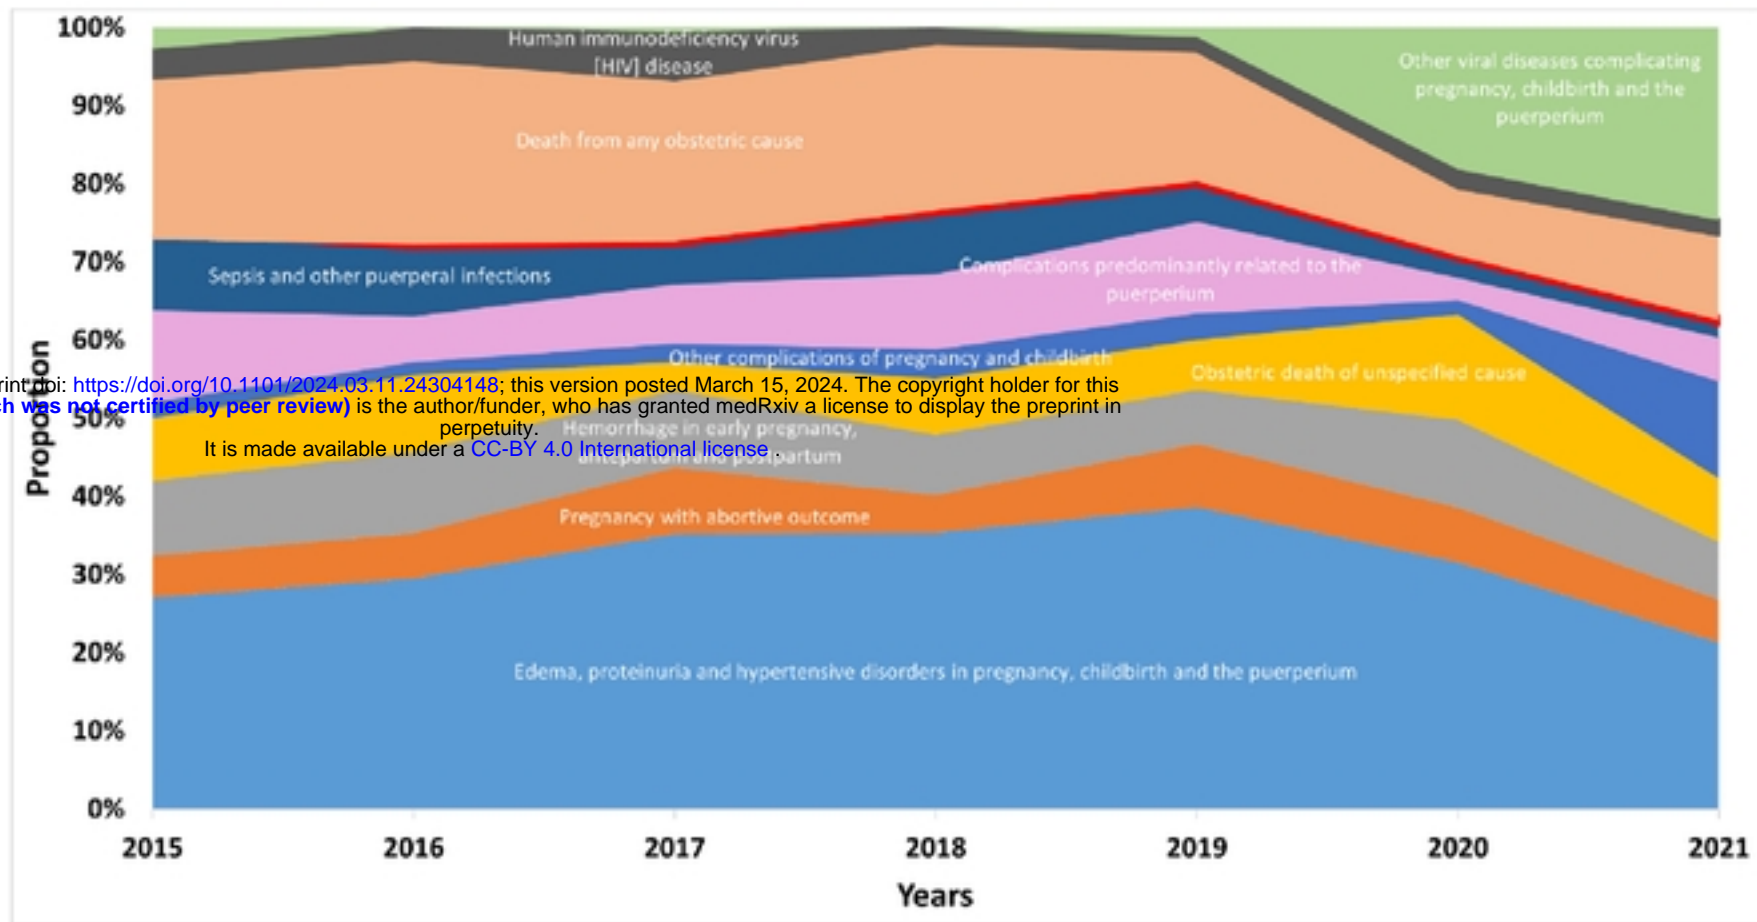

medRxiv preprint doi: <https://doi.org/10.1101/2024.03.11.24304148>; this version posted March 15, 2024. The copyright holder for this preprint (which was not certified by peer review) is the author/funder, who has granted medRxiv a license to display the preprint in perpetuity. It is made available under a [CC-BY 4.0 International license](https://creativecommons.org/licenses/by/4.0/).

Source: National Epidemiological Surveillance System (SINAVE).

**Figure 4. Maternal Mortality Ratio by province of residence, Dominican Republic, 2015-2021**

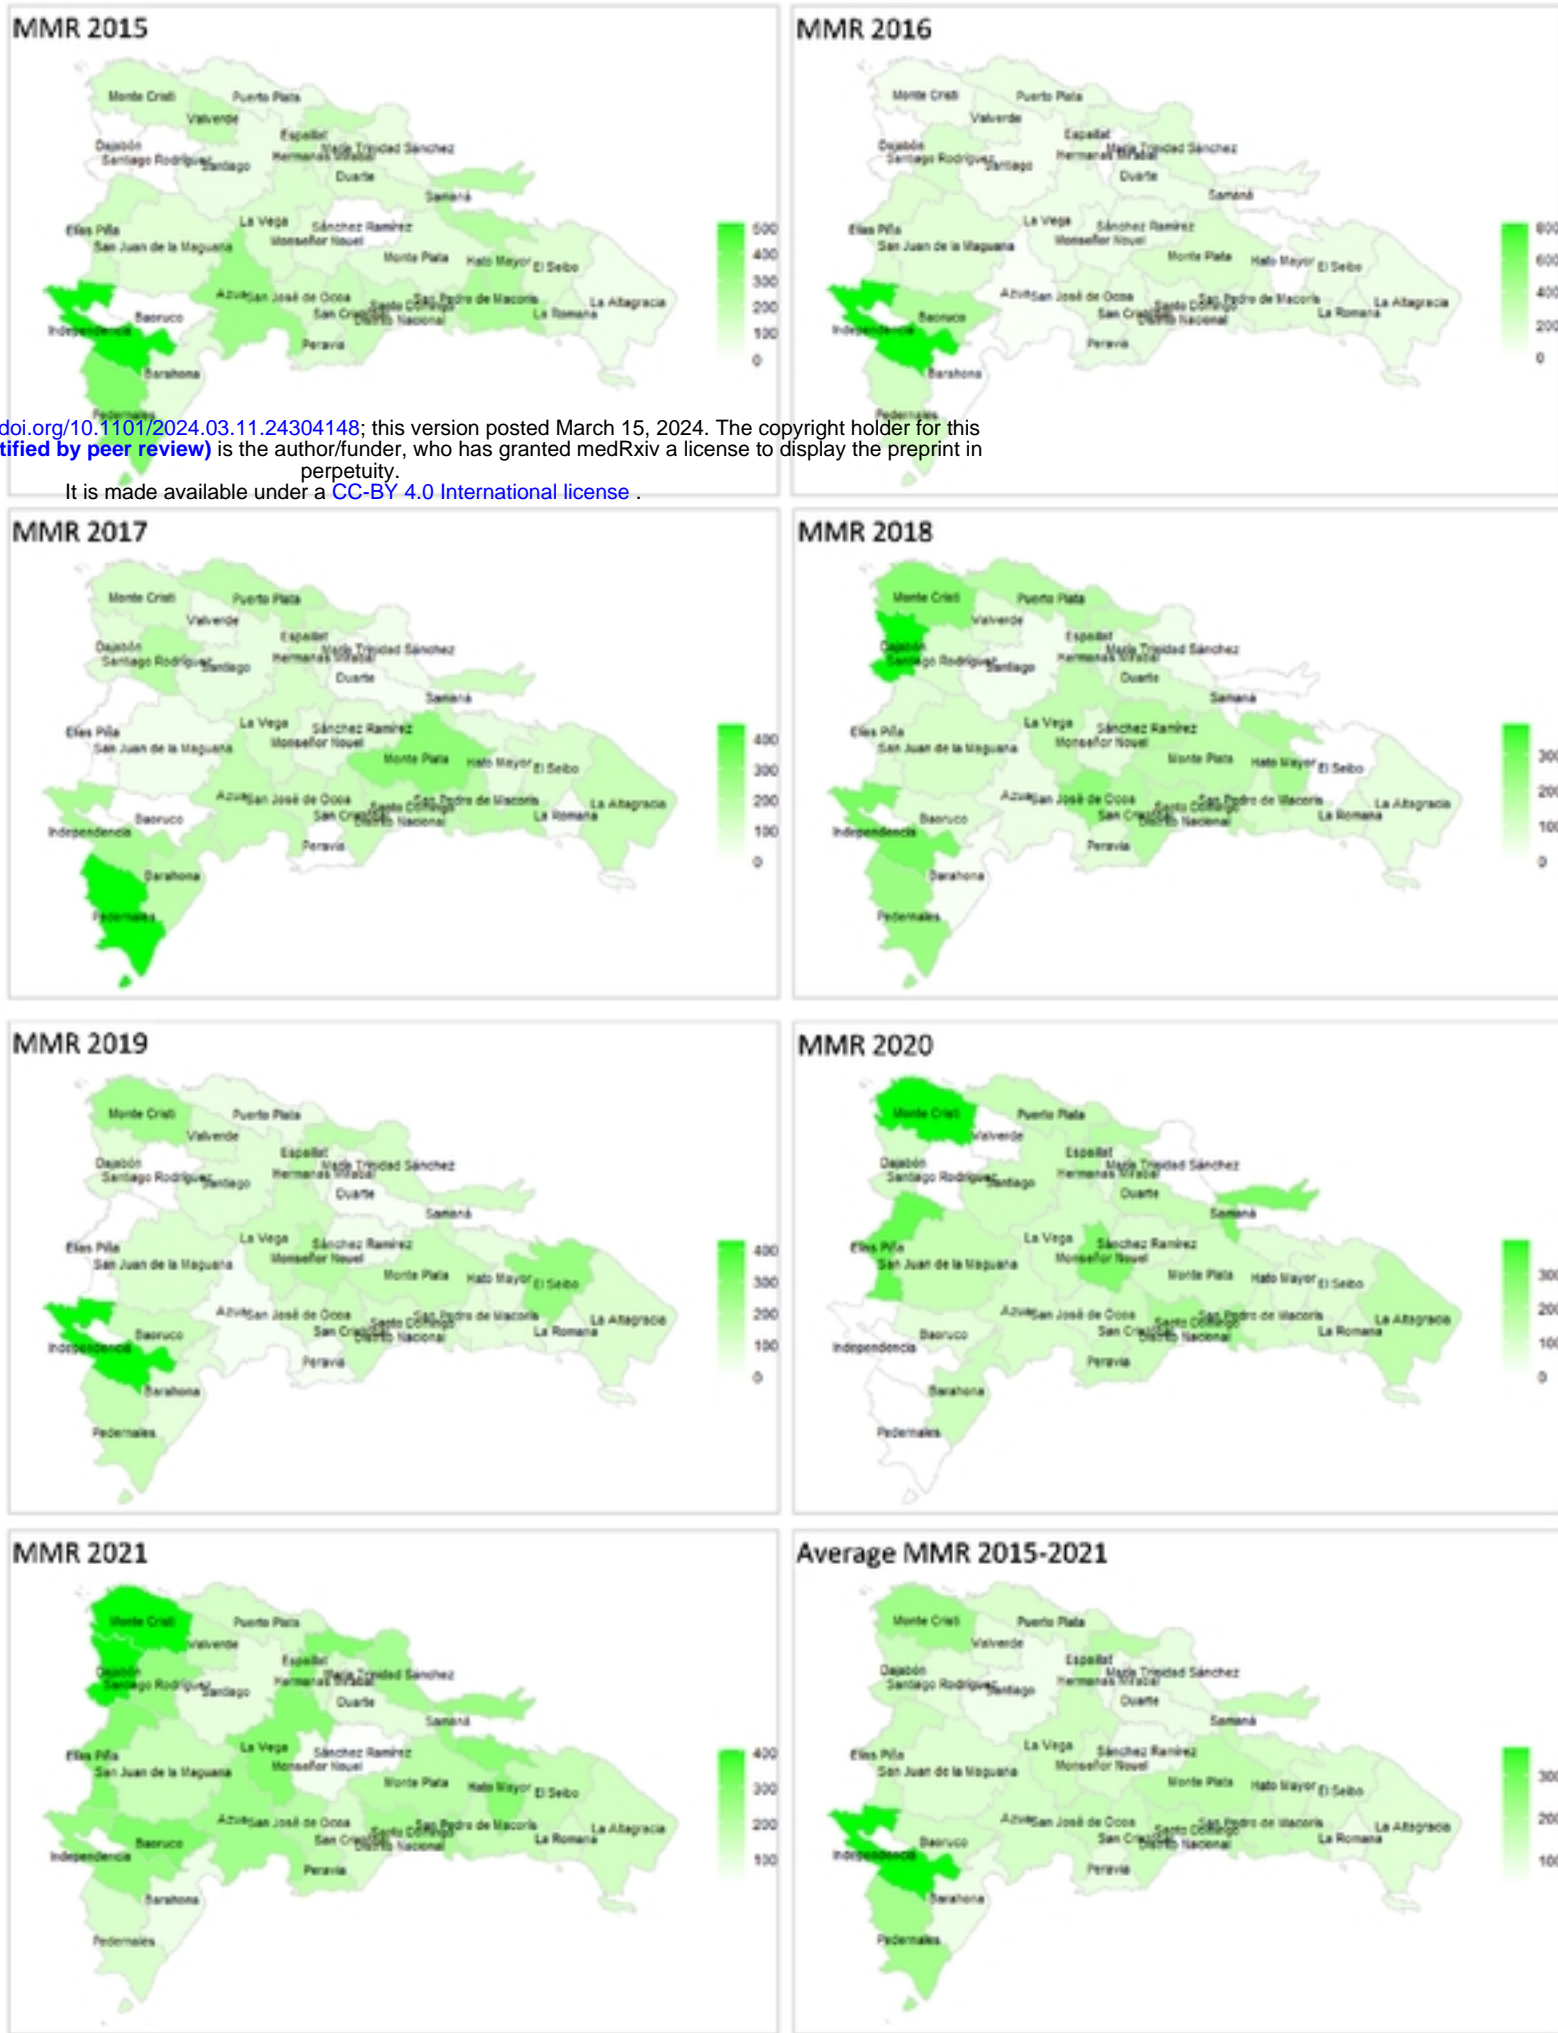

medRxiv preprint doi: <https://doi.org/10.1101/2024.03.11.24304148>; this version posted March 15, 2024. The copyright holder for this preprint (which was not certified by peer review) is the author/funder, who has granted medRxiv a license to display the preprint in perpetuity. It is made available under a [CC-BY 4.0 International license](https://creativecommons.org/licenses/by/4.0/).

Source: National Epidemiological Surveillance System (SINAVE).
